# Supplementary material for: Surface characterization of thiol ligands on CdTe quantum dots: analysis by 1H NMR and DOSY
Source: Royal Society of Chemistry journal article supplement (doi:10.1039/c8nj05914d), 2019-01-01
Supplement: c8nj05914d1.pdf [file c8nj05914d1.pdf]

Electronic Supporting Information for

# Surface characterization of thiol ligands on CdTe quantum dots: analysis by $^1\text{H}$ NMR and DOSY

Carlos A. Martínez Bonilla,<sup>a,§</sup> Mary-Helena Torres Flórez,<sup>b</sup> Daniel R. Molina Velasco,<sup>b</sup> and Vladimir V. Kouznetsov<sup>a\*</sup>

<sup>a</sup> *Laboratorio de Química Orgánica y Biomolecular, CMN, Universidad Industrial de Santander, Parque Tecnológico Guatiguará, Km 2 Vía Refugio, Piedecuesta, A.A. 681011, Colombia.*

<sup>b</sup> *Laboratorio de Resonancia Magnética Nuclear, Universidad Industrial de Santander, Km 2 vía refugio, Piedecuesta, A.A. 681011, Colombia.*

<sup>§</sup>*Present address: Universidad Santo Tomas, seccional Bucaramanga, Facultad de Química Ambiental, Santander.*

Corresponding author. E-mail: kouznet@uis.edu.co

| <b>Table of Contents</b> |                            | <b>Pages</b> |
|--------------------------|----------------------------|--------------|
| <b>1</b>                 | <b>Synthetic procedure</b> | <b>S2</b>    |
| <b>2</b>                 | <b>NMR experiments</b>     | <b>S2</b>    |

## 1. Synthetic procedure

CdTe QDs were synthesized by mixing 4 mmol of CdCl<sub>2</sub>, 3.2 mmol of tioglicolic acid (TGA), and 200 mL of deionized water (DI) in a 250 mL three-neck flask under vigorous stirring and argon inert atmosphere. A 2.0 N NaOH solution was slowly added to adjust the pH of the mixture to 10. The chalcogenide precursor was prepared mixing 0.6 mmol NaBH<sub>4</sub> and 0.2 mmol Te in 5 mL of DI water under vigorous stirring under inert atmosphere. The freshly prepared NaHTe solution was quickly injected into the Cd-thiol ligand precursor solution and the final mixture was refluxed for 0.5, 1, 4 and 10 h. The obtained CdTe-TGA QDs were purified by centrifugation at 5000 rpm for 15 min, followed by successive dissolution and precipitations sequential process using acetone and DI water.

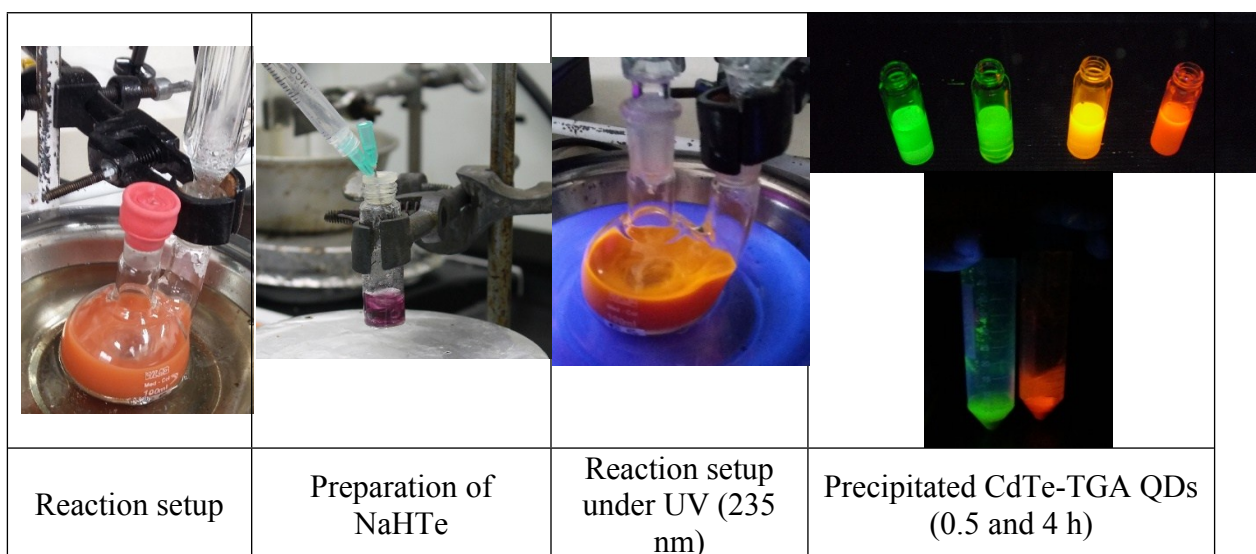

**Fig. 1S.** Visual steps of procedure for CdTe-TGA preparation.

## 2. NMR experiments

The NMR measurements were obtained with a Bruker Advance-III spectrometer operating at 400.16 MHz. Samples were prepared dissolving 3 mg of each QDs in 450  $\mu$ L of D<sub>2</sub>O (Merck, 99.8 % D) or DMSO (Merck, 99.8 % D). <sup>1</sup>H-DOSY experiments were carried out by a pulse field gradient spin-echo PFGSE decay (pulse sequence *ledbpgp2s* by Bruker). A diffusion time ( $\Delta$ ) of 0.05 s and P30 (1300  $\mu$ s) were used; the diffusion coefficient

(DC) values and the viscosity ( $\eta$ ) of 1.0963 mPa s for D<sub>2</sub>O were used to calculate the hydrodynamic radius (dH) according to the Stokes-Einstein equation. All experiments were performed at 298 K and Topspin 2.1 software was used for processing all spectra. With the experimental parameters optimized, full signal attenuation was achieved after 32 steps of linearly increasing the gradient strength from 2% to 95%. About 3 mg of each sample were dissolved in 450  $\mu$ L of D<sub>2</sub>O.

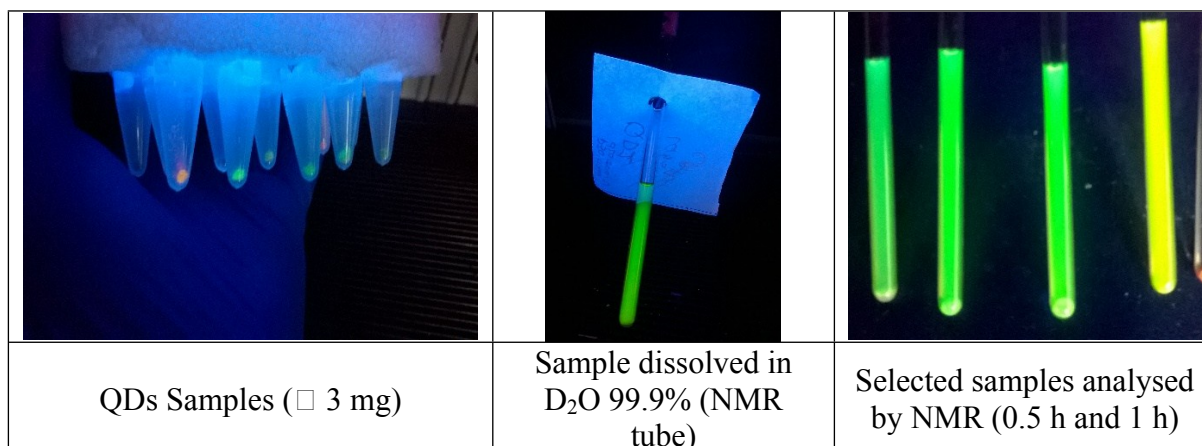

**Fig. 2S.** Visual steps of NMR experiments.
